# Supplementary material for: Eckol as a Potential Therapeutic against Neurodegenerative Diseases Targeting Dopamine D3/D4 Receptors
Source: PubMed Central journal article supplement (PMC6409773; doi:10.3390/md17020108), 2019-02-10
Supplement: marinedrugs-17-00108-s001.pdf [file marinedrugs-17-00108-s001.pdf]

## *Supplementary Materials*

# **Eckol as a Potential Therapeutic against Neurodegenerative Diseases Targeting Dopamine D<sub>3</sub>/D<sub>4</sub> Receptors**

**Pradeep Paudel <sup>1</sup>, Su Hui Seong <sup>1</sup>, Sangwook Wu <sup>2</sup>, Suhyun Park <sup>2</sup>, Hyun Ah Jung <sup>3,\*</sup> and Jae Sue Choi <sup>1,\*</sup>**

<sup>1</sup> Department of Food and Life Science, Pukyong National University, Busan 48513, Korea; phr.paudel@gmail.com (P.P.); seongsuhui@naver.com (S.H.S.)

<sup>2</sup> Department of Physics, Pukyong National University, Busan 48513, Korea; sangwoow@pknu.ac.kr (S.W.); psh7990@naver.com (S.P.)

<sup>3</sup> Department of Food Science and Human Nutrition, Chonbuk National University, Jeonju 54896, Korea

\* Correspondence: jungha@jbnu.ac.kr (H.A.J.); choijs@pknu.ac.kr (J.S.C.); Tel.: +82-63-270-4882 (H.A.J.); +82-51-629-5845 (J.S.C.)

**Table S1.** Experimental conditions for cell-based functional assays.

| Assay/Receptor                                                             | Source                             | Stimulus                                                                             | Incubation      | Measured component                | Detection method |
|----------------------------------------------------------------------------|------------------------------------|--------------------------------------------------------------------------------------|-----------------|-----------------------------------|------------------|
| D <sub>1</sub> ( <i>h</i> ) Dopamine<br>(agonist effect)                   | Human recombinant<br>(CHO cells)   | None<br>(control: 10 $\mu$ M dopamine)                                               | 30 min<br>RT    | cAMP                              | HTRF             |
| D <sub>1</sub> ( <i>h</i> ) Dopamine<br>(antagonist effect)                | Human recombinant<br>(CHO cells)   | Dopamine (300 nM)                                                                    | 30 min<br>RT    | cAMP                              | HTRF             |
| D <sub>3</sub> ( <i>h</i> ) Dopamine<br>(agonist effect)                   | Human recombinant<br>(CHO cells)   | None<br>(control: 300 nM dopamine)                                                   | 30 min<br>37 °C | cAMP                              | HTRF             |
| D <sub>3</sub> ( <i>h</i> ) Dopamine<br>(antagonist effect)                | Human recombinant<br>(CHO cells)   | Dopamine (10 nM)                                                                     | 30 min<br>37 °C | cAMP                              | HTRF             |
| D <sub>4</sub> ( <i>h</i> ) Dopamine<br>(agonist effect)                   | Human recombinant<br>(CHO cells)   | None<br>(control: 10 $\mu$ M dopamine)                                               | 10 min<br>37 °C | cAMP                              | HTRF             |
| D <sub>4</sub> ( <i>h</i> ) Dopamine<br>(antagonist effect)                | Human recombinant<br>(CHO cells)   | Dopamine (100 nM)                                                                    | 10 min<br>37 °C | cAMP                              | HTRF             |
| M <sub>5</sub> ( <i>h</i> ) Muscarinic<br>(agonist effect)                 | Human recombinant<br>(RBL cells)   | None<br>(control: 0.624 $\mu$ M ACh)                                                 | RT              | Intracellular [Ca <sup>2+</sup> ] | Fluorimetry      |
| M <sub>5</sub> ( <i>h</i> ) Muscarinic<br>(antagonist effect)              | Human recombinant<br>(RBL cells)   | ACh (10 nM)                                                                          | RT              | Intracellular [Ca <sup>2+</sup> ] | Fluorimetry      |
| NK <sub>1</sub> ( <i>h</i> ) Tachykinin<br>(agonist effect)                | Human endogenous<br>(U373MG cells) | None<br>(control: 30 nM [Sar <sup>9</sup> , Met(O <sub>2</sub> ) <sup>11</sup> ]-SP) | RT              | Intracellular [Ca <sup>2+</sup> ] | Fluorimetry      |
| NK <sub>1</sub> ( <i>h</i> ) Tachykinin<br>(antagonist effect)             | Human endogenous<br>(U373MG cells) | [Sar <sup>9</sup> , Met(O <sub>2</sub> ) <sup>11</sup> ]-SP (1 nM)                   | RT              | Intracellular [Ca <sup>2+</sup> ] | Fluorimetry      |
| V <sub>1a</sub> ( <i>h</i> ) Vasopressin / Oxytocin<br>(agonist effect)    | Human recombinant<br>(CHO cells)   | None<br>(control: 1 $\mu$ M AVP)                                                     | RT              | Intracellular [Ca <sup>2+</sup> ] | Fluorimetry      |
| V <sub>1a</sub> ( <i>h</i> ) Vasopressin / Oxytocin<br>(antagonist effect) | Human recombinant<br>(CHO cells)   | AVP (10 nM)                                                                          | RT              | Intracellular [Ca <sup>2+</sup> ] | Fluorimetry      |
| 5-HT <sub>1A</sub> ( <i>h</i> ) Serotonin<br>(agonist effect)              | Human recombinant<br>(BA/F3 cells) | None<br>(control: 2.5 $\mu$ M serotonin)                                             | RT              | Intracellular [Ca <sup>2+</sup> ] | Fluorimetry      |
| 5-HT <sub>1A</sub> ( <i>h</i> ) Serotonin<br>(antagonist effect)           | Human recombinant<br>(BA/F3 cells) | Serotonin (30 nM)                                                                    | RT              | Intracellular [Ca <sup>2+</sup> ] | Fluorimetry      |

HTRF: Homogeneous time-resolved fluorescence.

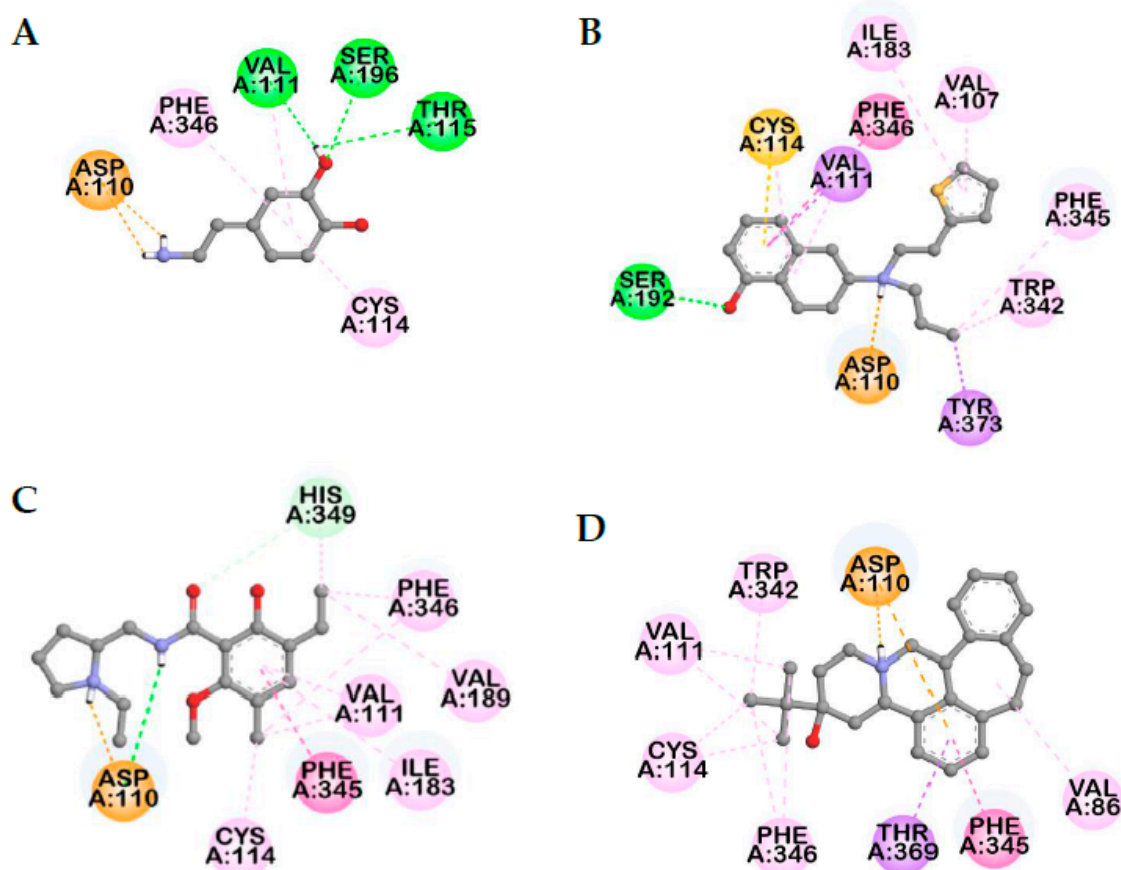

**Figure S1.** Molecular docking models for D<sub>3</sub>R binding with positive controls, dopamine (A), reported agonist rotigotine (B), reported antagonists eticlopride (C) and (+)-butaclamol (D).

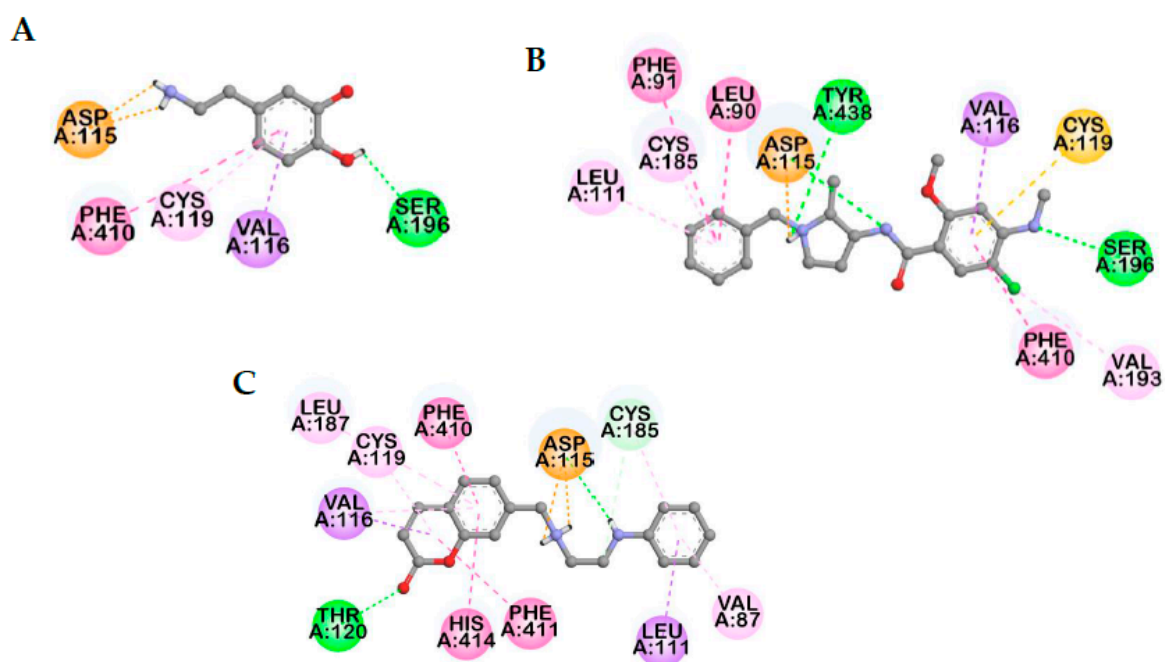

**Figure S2.** Molecular docking models for D<sub>4</sub>R binding with positive controls, dopamine (A), reported agonist nemonapride (B), and reported antagonist CHEMBL332154 (C).
